# Supplementary material for: Analytical capabilities of LA-ICP-ToF-MS for ultra-fast 2D quantitative elemental mapping of micrometeorites
Source: Royal Society of Chemistry journal article supplement (doi:10.1039/d3ja00335c), 2024-01-01
Supplement: d3ja00335c1.xlsx [file d3ja00335c1.xlsx]

## Sheet: SEM vs LA-ICP-ToF-MS comparison
											SEM-EDS data on the areas in some MM, recalculated to ppm (from the master thesis of Melvin)
												at weight element	28.084	55.845	24.305	26.9815	40.078
LA-ICP-TOF-MS data on the areas in some MM, ppm												at weight oxide	60.083	71.844	40.304	101.961	56.077
												ppm	Si	Fe	Mg	Al	Ca
	ppm	Si	Fe (57Fe)	Mg	Al	Ca					MM 2 [D]	Spectrum 22	174348	234747	147745	18523.8	19296.8
MM 2 [D]	average MM	180800	215400	138800	18910	16000						σ	467.42	1554.62	603.042	529.252	357.348
											MM 6 [B]	Spectrum 13	204730	135252	183325	11114.3	11435.1
MM 6 [B]	average MM	216300	136100	178500	9787	11780						σ	467.42	777.309	603.042	529.252	357.348
											MM 9 [E]	Spectrum 4	135084	384768	110960	11643.5	5717.57
MM 9 [E]	average MM	126300	362900	79630	12180	12790						σ	467.42	1554.62	603.042	529.252	357.348

## Sheet: GRM results compillation
Electronic supplementary material for "Analytical capabilities of LA-ICP-ToF-MS for ultra-fast 2D quantitative elemental mapping of micrometeorites" by Stepan M. Chernonozhkin, Thibaut Van Acker, Stijn J. M. Van Malderen, Joke Belza, Steven Goderis, and Frank Vanhaecke
The results of LA-ICP-ToF-MS analysis of some MPI-DING and USGS glass reference materials at UGent, µg/g. Each analyses is an average value of 3-5 2D maps measured in a course of one day sessions. The uncertainty (grey, italic) is the combined total uncertainty on the average (1s)
	GOR128-G	s	GOR128-G	s	GOR128-G	s	GOR128-G	s	GOR128-G	s	GOR128-G	s	GOR128-G	s	StHS6/80-G	s	StHS6/80-G	s	StHS6/80-G	s	StHS6/80-G	s	StHS6/80-G	s	StHS6/80-G	s	BHVO-2G	s	BHVO-2G	s	BHVO-2G	s	BHVO-2G	s	BHVO-2G	s	BHVO-2G	s	BHVO-2G	s	BHVO-2G	s
[23Na]+	7132	202.9	5371	449	6509	540.6	7372	358.3	5502	632.7	5550	695.2	5273	523.9	36450	2613	32650	3022	32100	3707	33680	3672	32490	2870	33950	1946	17140	1222	18460	865.5	16160	1953	16890	1364	14620	1628	17050	1204	16850	2545	17060	2204
[24Mg]+	158900	6029	155400	17600	149600	10320	151500	6111	150100	14700	155800	16640	153300	17630	11070	1076	10380	666.9	12160	1195	11740	1090	11440	1165	11100	741.8	43900	4238	46180	2945	42310	4363	48020	14360	30890	3976	40900	3371	45810	6707	45890	5756
[25Mg]+	154000	6232	155400	18630	146500	9567	146000	5673	153600	12760	154000	13950	155500	19890	11400	1174	10480	659	11970	997.8	11490	905.7	11520	1307	11070	804.7	44530	4554	45840	3133	41580	3632	48610	14940	30390	4349	40380	3611	45890	6777	45660	5776
[26Mg]+	150500	6118	155500	18660	143500	9631	140700	5611	152800	13120	154600	14470	155000	19440	11290	1165	10650	703.7	11950	1030	11480	934	11470	1274	11090	820.4	44280	4527	45950	3139	41830	3776	48080	14430	30190	4236	40360	3679	45520	6716	46060	5820
[27Al]+	46810	2073	50390	6598	48990	4037	49400	2404	49090	5079	49490	5585	49590	3250	92870	10390	93120	7645	109000	11300	101700	9958	100600	5829	95590	5632	73620	8199	75800	5640	65630	7143	69630	33810	57900	4231	69090	5021	71610	9965	72970	8695
[28Si]+	226100	6020	218300	17160	234500	29470	236800	17680	227100	20090	219200	21120	221800	16910	297200	19940	303300	38990	283600	25170	291900	24450	290800	19620	293000	17430	232400	15530	231700	10390	246600	22930	238600	40650	284300	24210	236100	17310	228500	27790	226600	23610
[29Si]+	221800	6318	219700	18050	236100	30970	237700	18800	225400	18270	218700	19290	229800	17990	297200	20830	305300	41130	287500	23390	294900	22650	290800	20180	296900	17270	230700	16120	233500	10960	245700	20930	237200	40340	284200	24860	238300	17080	228200	28230	223300	23650
[31P]+	150.2	18.96	187.4	49.83	137	22.96	143	19.45	228.1	36.47	238.7	41.95	238.5	54.61	839.2	185.9	595.9	138.3	690.6	109.8	771.9	116	735.7	149.4	723.5	79.65	1084	238.9	1024	153.4	1209	200.3	1209	297	1695	428.2	1302	172.4	1068	221.6	947.7	170.5
[32S]+			2.934	2.375	4.478	4.484			2.009	0.004851	5.247	0.01145	2.065	0.00985	2.629	1.811	5.76	0.05749	4.585	0.011	2.11	0.005008	6.884	0.01985	7.029	0.02693	1.8	1.24			3.302	0.007609	0	nan	4.972	0.01537	6.026	0.03286	4.462	0.01682	4.826	0.01859
[34S]+	2.399	0.5165	2.754	1.785	5.568	3.533	5.706	2.183	3.816	0.06023	3.289	0.05154	4.871	0.07603	3.229	1.778	6.262	0.1825	3.577	0.06058	4.128	0.06196	5.757	0.07771	7.498	0.1485	2.907	1.593	2.612	0.9396	3.524	0.05366	0	nan	4.434	0.0603	6.646	0.1348	4.295	0.07262	4.47	0.07864
[39K]+	1093	73.01	920.6	182.7	2176	287.5	2460	193.6	727.3	119.5	944.3	170.8	542.6	74.92	12640	2136	11710	1327	9591	1586	9333	1458	9935	1216	11050	901.3	4679	789.4	4844	550.5	3980	689.4	4980	481.3	7149	1094	5161	517.9	5321	918.8	5274	779.1
[42Ca]+	30720	1585	41040	5779	34130	2145	31690	1393	44740	6709	37700	6171	37390	3995	38560	4620	34380	2025	41810	6281	44500	6315	44180	4191	38860	3307	78980	9410	80820	6549	74930	11830	88600	38760	56230	6714	82430	8621	79010	10440	87590	9905
[43Ca]+	31630	2148	38460	6592	32620	2260	30300	1661	39540	6309	36860	6461	37430	4690	36180	5330	34900	2315	40340	6479	40140	6065	39420	4364	38970	3033	75670	10970	72710	7222	75400	12670	69940	40030	55960	7744	81230	7693	81250	11320	82400	9916
[44Ca]+	33750	1595	39720	5609	34560	1950	33280	1199	41420	6458	38730	6596	40190	5089	38260	4584	35850	2031	42550	6648	41270	6087	40520	4569	38160	3151	80450	9589	83160	6664	75690	12420	89410	40660	56730	8047	80780	8204	83680	10420	83950	8940
[45Sc]+	25.2	1.913	30.6	5.379	26.27	3.224	25.47	2.371	33.1	4.358	31.35	4.491	30.35	6.48	11.28	1.767	9.779	1.377	14.24	1.896	13.62	1.736	25.52	4.843	13.85	1.724	31.96	4.774	34.05	3.535	32.41	4.503	23.45	3.45	38.64	9.232	30.57	4.629	30.33	5.671	30.13	4.852
[47Ti]+	1396	68.62	1539	195.8	1302	159.1	1346	104.9	1575	126.4	1422	124.3	1441	149.8	4062	434.3	3720	384.4	4302	344.9	4402	333.5	3900	355	3909	272.8	16750	1777	17260	1234	15240	1280	16890	3048	15780	1806	15540	1335	16780	1768	17140	1546
[49Ti]+	1478	72.04	1579	192.4	1366	146	1328	96.97	1544	120.8	1415	120.1	1448	149.8	4082	418.5	3870	351.6	4383	341.4	4357	320.4	3879	350.7	3910	271	16810	1704	17610	1200	15310	1249	17040	3325	15750	1790	15590	1328	16690	1819	17000	1585
[51V]+	167.1	6.713	175.5	19.05	141.5	11.6	146.5	7.87	175.4	31.15	166.7	32.36	178.6	23.02	82.36	7.664	78.26	14.43	78.74	14.03	81.97	13.77	84.35	9.636	82.28	6.066	316	28.89	327.4	20.13	304.3	56.82	302.9	84.18	247	35.49	307.7	27.75	297.3	41.15	305.2	36.25
[52Cr]+	2202	157.3	2323	513.8	1779	189.9	1648	106.2	2196	518.5	2322	597.6	2204	664.3	19.52	3.749	19.08	5.681	17.83	4.222	15.5	3.468	40.8	10.84	22.38	3.287	317	59.35	310.1	39.01	305.6	75.91	283.8	88.39	293.1	98.55	285.9	51.45	343.8	113.1	351.6	99.23
[53Cr]+	2190	172.3	2323	550	1862	242.3	1877	149.7	2175	530.9	2340	622.2	2235	690.2	17.15	4.104	9.885	3.509	15.37	3.906	12.06	2.933	20.53	5.78	3.385	1.222	319.9	65.17	310.1	43.63	313.3	80.66	298.1	111.5	266.8	92.47	310.3	59.95	264.7	89.15	270.1	78.13
[55Mn]+									1407	173.6	1473	198.3	1331	138.1									551	50.65	554.7	48.96					1365	177.1	1490	464.8	999.6	115.9	1301	141.6	1378	179.5	1371	152.9
[57Fe]+	70710	2667	76390	8842	65510	8633	60680	4768	69500	11330	76220	13530	75440	7453	31560	3100	29420	2963	32290	5286	28850	4457	33750	2954	31990	1393	86230	8408	82690	5399	81210	13920	81350	21650	65040	7180	82370	4417	83370	8688	82660	7379
[59Co]+	93.16	4.489	88.72	11.63	75.99	7.481	66.61	4.395	65.31	11.29	75.93	14.27	95.85	17.71	13.05	1.558	12.06	1.672	10.59	1.844	9.559	1.574	18.48	3.049	13.12	1.729	45.45	5.095	45.02	3.543	35.81	6.49	42.25	5.377	40.58	8.375	42.21	6.792	40.85	6.858	42.56	6.153
[60Ni]+	1097	104.5	1087	318.4	950.2	135.4	869.3	76.72	957.6	244.4	1151	319.4	1020	186	23.51	5.989	20.92	4.344	33.62	8.65	26.57	6.438	25.56	4.277	43.95	5.605	120.2	29.87	115.5	19.52	127.5	34.27	132.2	17.13	253.8	51.13	123	18.85	144.9	44.72	133.9	35.09
[62Ni]+	1122	122.2	1075	348	977.6	304.3	956.4	179.1	946.9	258.1	1155	342.5	1043	219.9	20.8	6.845	23.73	9.088	34.89	9.839	27.44	7.39	35.54	7.182	46.53	7.859	129.4	36.57	115.6	22.7	124.2	35.85	132.4	22.39	274.7	64.24	128	24.98	155.8	56.23	126.7	39.49
[63Cu]+	67.99	4.799	71.95	13.71	62.12	7.135	57.62	4.535	54.78	12.05	70.52	16.96	69.62	19.69	46.64	7.615	36.99	7.577	37.26	8.211	32.91	6.849	40.88	10.41	57.49	10.25	121.4	19.37	111.5	12.31	116.8	26.95	141.6	21.49	153.9	48.17	124.9	27.44	118.9	34.42	116.8	28.99
[65Cu]+	69.19	5.813	73.47	15.99	57.87	8.028	59.89	5.694	54.91	12.15	71.28	17.21	67.57	19.42	43.9	8.108	38	8.514	37.63	8.362	32.26	6.791	39.77	10.31	56	10.05	115.3	21	114.3	13.93	115.6	26.92	139.3	22.07	158.6	50.19	123.1	27.09	116.5	46.45	114.8	39.28
[66Zn]+	82.86	6.48	73.97	15.05	85.92	16.42	73.55	9.548	110.1	24.77	114.9	28.61	120.1	42.85	76.89	13.28	72.62	16.8	103.1	23.27	105.3	22.52	101.3	33.16	87.7	17.28	114.7	19.49	122.8	14.59	176.6	41.85	151.4	34.2	112.9	44.87	137.8	26.05	110	24.55	95.57	17.87
[67Zn]+	89.47	13.39	71.05	24.33	99.29	18.45	98.4	18.76	109.1	25.42	113.5	29.18	118.6	27.5	87.11	25.1	72.52	16.43	107.6	25.12	105.1	23.33	115.4	24.62	91.96	18.15	127.3	36.79	125.3	24.43	175.1	42.76	152.1	35.03	120.1	31.24	144	29.03	117.7	34.09	88.04	21.54
[68Zn]+	99.19	7.786	79.69	16.25	75	17.81	78.97	12.07	109.7	24.52	116	28.76	109.2	27.99	80.83	14.05	75.27	20.52	101.6	22.89	108.8	23.18	127.7	29.8	101	18.46	120.4	20.65	123.3	14.29	174.2	41.12	158	36.83	126	36.16	139.4	26.95	127.4	53.31	108.6	38.58
[69Ga]+	10.38	0.7648	9.279	1.485	10.47	2.731	10.43	1.67	6.546	4.72	7.801	6.174	8.839	7.505	22.19	2.965	22.56	6.479	15.96	11.54	14.57	9.947	30.39	22.9	20.31	11.19	21.37	2.809	21.94	1.974	16.2	12.28	19.49	7.365	20.71	19.64	20.47	13.96	19.01	16.26	18.11	13.25
[71Ga]+	11.16	1.008	9.515	1.869	9.93	2.524	12.78	2.135	6.431	4.648	7.845	6.191	8.746	7.459	22.63	3.684	21.57	6.096	14.83	10.77	12.97	8.867	18.09	13.7	18.14	10.02	20.96	3.386	20.2	2.258	16.1	12.18	19.79	7.457	18.68	17.76	19.75	13.45	20.15	3.923	21.33	3.609
[72Ge]+	1.211	0.3066	1.021	0.5771	1.153	0.6973	2.72	0.9241	2.291	3.146	2.205	3.486	2.031	4.311	1.015	0.4905	1.139	1.063	1.438	1.97	1.614	2.089	2.706	5.018	2.647	3.831	1.381	0.6613	1.753	0.6253	2.275	3.312	5.907	4.342	18.04	42.32	4.046	7.253	5.744	11.28	7.905	13.27
[73Ge]+	1.399	0.7746	0.6859	0.7563	0.7757	0.82	1.461	0.7968	1.253	1.738	1.385	2.047	0.8851	1.816	0.5151	0.5066	0.9145	1.064	1.106	1.487	1.306	1.681	1.43	2.666	0.9625	1.438	1.643	1.452	2.646	1.328	1.566	2.328	2.204	1.716	18.28	42.65	2.032	3.668	2.011	3.897	2.733	4.675
[75As]+	0.7756	0.5658	0.8631	1.811	1.336	1.403	1.623	0.9775	1.049	1.338	1.95	3.559	0.567	0.8233	2.198	3.898	2.238	1.368	2.468	3.094	2.953	3.512	3.437	4.432	1.666	1.545	1.146	2.1	2.179	2.366	1.409	1.881	5.025	1.787	12.77	20.92	0.1592	0.2479	-1.856	2.35	-2.14	2.375
[77Se]+	0.1019	0.05636	0.03708	0.05782	0.1393	0.1605	0.03474	0.04765	12.8	21.81	9.748	17.42	3.149	6.123	0.04706	0.06516	0.04017	0.0185	15.12	25.1	8.891	14	11.93	21.86	2.568	7.887	0.1357	0.1792	0.141	0.1071	8.908	15.16	25.63	23.56	14.9	33.64	-1.299	13.36	-2.784	14.14	1.747	8.137
[78Se]+	0.2541	0.1817	0.0616	0.1396	0.06453	0.09185	0.1105	0.1032	18.39	30.37	11.1	19.75	2.707	6.127	0.1501	0.2954	0.03314	0.02214	8.897	15.3	17.98	27.83	11.54	20.25	-91.62	1919	0.08386	0.1905	0.2951	0.2691	18.02	30.63	22.6	27.43	8.32	19.19	-17.98	700.8	14.38	28.76	7.106	13.19
[85Rb]+	1.504	0.2465	0.7437	0.1965	2.987	0.5759	3.127	0.4759	0.6778	0.1061	1.303	0.5268	0.4976	0.05821	34.35	6.762	33.98	6.723	28.32	4.139	26.51	3.661	25.99	1.82	28.21	1.783	9.934	1.966	11	1.475	9.279	1.424	8.62	0.6814	13.37	1.177	9.754	0.762	9.031	1.058	8.983	0.9079
[88Sr]+	30.7	1.353	31.9	3.171	31.1	1.964	30.54	1.425	24.85	4.434	28.22	5.492	27.47	4.994	503	42.21	477.4	25.85	512.2	91.62	441	74.41	481.4	77.51	529.9	16.78	403.8	33.59	433	23.98	340.2	63.84	303.2	89.2	244.7	49.82	385.6	15.05	409.4	69.75	407.3	59.33
[89Y]+	9.825	0.5736	10.24	1.195	12.39	1.845	11.71	1.16	11.1	1.682	11.12	1.841	10.18	3.252	12.19	1.212	14.79	1.839	15.56	2.352	13.5	1.936	13.89	3.905	12.45	0.8797	24.73	2.398	25.53	1.719	22.65	3.599	27.45	7.825	21.36	7.524	23.6	2.032	24.32	4.559	24.91	3.997
[90Zr]+	8.866	0.6559	7.737	0.9332	7.705	0.6426	8.938	0.7617	9.278	2.917	10.37	3.576	11.42	1.48	115.2	10.76	120.8	7.101	126.6	39.93	116.2	34.63	137.4	15.26	121	10.97	172.7	16	175.3	10.99	124	41.07	110.4	24.35	157.8	22.13	151.6	16.92	151	41.11	153.7	35.79
[91Zr]+	7.559	1.17	8.23	1.419	10.17	1.548	10.21	1.848	8.764	2.786	10.65	3.653	11.7	1.62	118.5	14.01	122	13.35	129.4	40.56	111.6	33.11	140.6	16.09	122	11.59	171.1	19.95	179.8	14.44	125.9	41.36	109.4	24.62	156.9	22.61	153.1	17.81	148.7	40.28	153.9	35.76
[93Nb]+	0.07669	0.02686	0.04887	0.02168	0.2114	0.07325	0.05454	0.03913	0.09964	0.02321	0.1462	0.03169	0.1698	0.1091	5.98	0.616	6.182	1.039	7.42	1.046	6.966	0.9258	6.842	3.793	6.41	0.5999	17.01	1.645	18.5	1.276	17.84	2.624	17.96	4.22	22.23	15.49	16.69	1.886	12.8	9.386	13.16	8.203
[95Mo]+	0.6585	0.25	0.384	0.1964	0.6149	0.4953	1.009	0.6935	0.5118	0.3062	0.7978	0.6703	0.5469	0.2581	2.236	0.7426	1.389	1.037	1.27	0.7344	1.157	0.6398	1.391	0.5592	1.098	0.3047	3.82	1.197	4.776	1.038	3.397	2.077	3.601	0.9273	6.747	3.321	3.768	1.221	3.911	1.785	3.726	1.499
[97Mo]+	1.074	0.4679	0.6985	0.3931	1.351	0.8137	2.859	1.426	0.5176	0.328	1.041	0.8398	0.6615	0.311	2.047	0.8543	2.833	1.722	0.9356	0.5656	0.8772	0.5022	1.429	0.5828	1.465	0.4652	4.756	1.807	6.794	1.861	4.099	2.551	3.432	0.9805	6.885	3.423	4.133	1.535	25.3	11.63	25.51	9.979
[103Rh]+	10.3	5.627	0.674	0.5349	0.392	0.3496	3.499	2.32	0	nan	0	nan	0.03235	0.01076	24.03	11.14	30.49	6.424	0	nan	0	nan	0.6858	0.05279	12.58	0.9726	2.84	1.681	1.977	1.869	0	nan	0	nan	0.02944	0.00903	0.3179	0.424	0.9321	0.4916	0.0333	0.6599
[105Pd]+	18.69	17.54	6.386	13.9	12.89	20.73	9.018	9.92	4.365	1.053	6.488	1.145	6.894	1.715	6.708	13.54	19.27	7.631	6.891	1.433	5.85	1.438	8.164	1.892	5.015	1.131	15.79	30.78	12.09	15	6.389	1.487	0	nan	8.396	1.868	2.974	0.8629	2.61	1.45	10.11	3.856
[107Ag]+	0.1479	0.08263	0.1097	0.1218	0.1159	0.06328	0.1108	0.04915	0.09113	0.01523	0.4106	0.2894	0.1302	0.04219	0.1334	0.1096	0.08293	0.02093	0.0752	0.01505	0.04339	0.009438	0.1497	0.05572	0.2768	0.08262	0.4417	0.3783	0.4825	0.2603	0.46	0.05795	0.5454	0.09167	0.8467	0.309	0.5784	0.1514	0.3795	0.1342	0.4009	0.1299
[109Ag]+	0.2985	0.1283	0.1093	0.116	0.07754	0.06625	0.0934	0.03942	0.06808	0.01319	0.4558	0.2862	0.1111	0.03972	0.0719	0.06662	0.08076	0.01978	0.06927	0.01447	0.04473	0.01043	0.1172	0.04203	0.2324	0.06164	0.4998	0.4348	0.3943	0.2289	0.4424	0.05933	0.5097	0.08465	0.839	0.2996	0.6351	0.1615	0.3554	0.1254	0.4265	0.1302
[111Cd]+	0.3013	0.2542	0.4432	0.8722	0.0318	0.03765	0.0818	0.06921	0.1703	0.1543	1.405	2.343	0.2992	0.324	0.08716	0.1408	0.1425	0.1006	0.2494	0.222	0.1753	0.1517	0.2467	0.2417	0.1065	0.09969	0.2046	0.3689	0.2013	0.2125	0.145	0.1409	0.5167	0.4595	0.8527	1.033	0.1621	0.1776	0.1791	0.2167	0.2364	0.2548
[115In]+	0.336	0.1645	0.2063	0.2709	0.434	0.3323	0.6555	0.2668	0.04166	0.02643	0.2305	0.2842	0.0302	0.0272	0.2205	0.2624	0.0951	0.1363	0.0835	0.05265	0.07839	0.04649	0.1025	0.07998	0.1018	0.06804	0.2104	0.2359	0.1391	0.1185	0.08676	0.0562	0.1138	0.06014	4.204	3.951	0.09063	0.07477	0.08884	0.08072	0.0926	0.07061
[117Sn]+	0.9051	0.3727	2.193	1.952	0.7371	0.2916	1.036	0.3194	0.6626	0.8375	1.213	1.856	0.9495	1.603	2.487	1.867	1.321	0.5571	1.489	1.903	1.14	1.351	1.813	2.737	4.429	4.488	2.48	1.904	2.188	0.9972	1.77	2.383	3.738	1.902	12.96	24.06	2.978	3.661	3.476	5.635	3.21	4.606
[118Sn]+	1.18	0.3017	1.896	1.399	0.7524	0.1792	0.7793	0.1388	0.582	0.7434	1.222	1.873	0.8564	1.437	2.229	1.376	1.185	0.4157	1.404	1.794	1.045	1.262	1.679	2.529	4.017	4.039	2.571	1.593	2.08	0.8488	1.65	2.212	3.293	1.655	12.8	23.75	2.863	3.457	3.816	6.25	3.617	5.099
[121Sb]+	0.09222	0.04951	0.08997	0.07982	0.1427	0.1052	0.1665	0.07868	0.2468	0.4591	2.395	7.206	0.2771	0.6577	0.2589	0.1928	0.1668	0.1098	0.4024	0.7445	0.3703	0.6485	0.3399	0.7202	9.636	13.17	0.1889	0.1361	0.2077	0.1111	0.3203	0.6266	0.3482	0.2655	26.2	69.77	2.254	3.561	3.287	7.529	2.824	5.417
[125Te]+	0	nan	0	nan	0	nan	0	nan	0	nan	0	nan	0	0	0	nan	0	nan	0	nan	0	nan	0	0	0	nan	0	nan	0	nan	0	nan	0	nan	0	0	0	nan	0	nan	0	nan
[127I]+	0	nan	0	nan	0	nan	0	nan	0	nan	0	nan	0	0	0	nan	0	nan	0	nan	0	nan	0	0	0	nan	0	nan	0	nan	0	nan	0	nan	0	0	0	nan	0	nan	0	nan
[133Cs]+	0.2901	0.04999	0.237	0.05355	0.291	0.07029	0.2922	0.05865	0.1788	0.08575	0.4526	0.3968	0.2366	0.1649	1.947	0.337	1.881	0.4423	1.401	0.6713	1.179	0.5329	1.699	1.048	2.031	0.3774	0.1233	0.02917	0.1741	0.03189	0.09234	0.04722	0.1389	0.03359	2.883	2.238	0.1271	0.02997	0.09669	0.06223	0.1461	0.07594
[135Ba]+	3.133	0.7025	0.9894	0.2439	3.911	0.6235	3.707	0.6647	4.263	0.8154	7.6	1.546	6.504	1.521	272.1	27.59	288	23.9	310.7	57.19	255.8	44.48	310.3	63.71	300.5	22.86	119.4	12.18	130.1	8.9	124.9	24.14	92.26	11.14	92.63	24.02	155.5	31.38	133.4	21.31	130.7	17.86
[137Ba]+	2.021	0.3495	1.485	0.2892	4.064	0.5388	4.565	0.7889	4.313	0.8191	7.164	1.455	6.57	1.512	266.8	30.39	286	23.14	312.3	58.27	252.4	44.45	309.8	62.58	295.3	21.23	118.1	13.38	130.7	9.842	120.6	23.61	97.85	10.05	92.37	23.52	145.6	25.65	139	21.51	134.8	17.8
[139La]+	0.1286	0.02927	0.1458	0.02779	0.1632	0.03751	0.2277	0.04964	0.2081	0.0354	0.2315	0.04186	0.2813	0.03157	10.97	0.9268	10.99	1.017	12.61	1.934	11.21	1.622	14.24	1.059	10.86	0.527	13.63	1.129	14.97	0.8369	13.61	2.183	14.67	2.015	12.88	1.205	12.72	0.751	11.55	1.336	11.95	1.189
[140Ce]+	0.4333	0.058	0.3642	0.06044	0.5168	0.06938	0.4975	0.07858	0.9708	0.1208	1.464	0.2169	1.552	0.1935	22.39	2.402	23.55	1.996	26.6	3.222	24.47	2.798	27.6	2.853	23.15	1.14	34.37	3.666	37.64	2.668	33.87	4.302	36.34	3.853	27.32	3.564	31.6	1.908	29.63	4.579	28.45	3.775
[141Pr]+	0.0824	0.01971	0.113	0.02569	0.07744	0.01691	0.1091	0.03806	0.1081	0.01984	0.139	0.02823	0.1518	0.02488	2.749	0.3797	2.808	0.2128	3.378	0.5544	2.716	0.4211	3.775	0.4673	2.799	0.3415	4.538	0.613	4.916	0.4402	4.932	0.8456	5.12	0.7913	4.664	0.7197	4.157	0.6211	4.395	0.6505	4.456	0.5693
[143Nd]+	0.8415	0.1896	0.7339	0.1723	0.5293	0.1951	0.5295	0.1388	0.5464	0.118	0.759	0.1759	0.7157	0.1128	11.88	1.713	12.05	1.264	15.57	3.041	11.72	2.167	14.54	1.639	13.36	0.7986	21.3	2.966	25.35	2.406	23.29	4.757	23.93	6.879	17.57	2.474	22.02	1.553	23.36	4.093	25.15	3.766
[146Nd]+	0.8044	0.1721	0.5557	0.1232	0.9262	0.2342	1.03	0.2401	0.6068	0.125	0.7867	0.172	0.6771	0.1015	11.81	1.594	14.69	3.132	14.87	2.869	11.59	2.116	14.11	1.582	13.23	0.7158	21.49	2.819	22.08	1.986	22.92	4.639	23.55	4.642	17.35	2.442	22.51	1.452	23.57	3.576	23.48	3.055
[147Sm]+	0.5669	0.1434	0.554	0.167	0.3591	0.104	0.5056	0.1484	0.4631	0.09887	0.4446	0.09903	0.3775	0.05936	2.979	0.6766	2.412	0.4964	3.502	0.6734	2.731	0.5013	3.099	0.3361	2.812	0.1848	5.117	1.134	5.992	0.9128	5.911	1.183	5.814	1.711	4.59	0.6002	5.242	0.3666	5.444	0.9224	5.329	0.7969
[149Sm]+	0.5709	0.1471	0.4852	0.1438	0.4894	0.148	0.4878	0.1266	0.5192	0.1179	0.5316	0.1275	0.4944	0.06893	2.211	0.4582	2.494	0.4363	3.631	0.7506	2.827	0.5561	3.029	0.2831	2.918	0.2375	5.466	1.109	5.807	0.7692	5.802	1.258	5.798	1.596	4.453	0.4985	5.458	0.4937	5.417	0.7686	5.134	0.6507
[151Eu]+	0.3199	0.06352	0.2945	0.08237	0.2804	0.06345	0.2256	0.05492	0.2145	0.04708	0.2476	0.06037	0.2185	0.03036	0.9035	0.2098	0.9237	0.1363	1.079	0.2301	0.84	0.1695	0.9958	0.1074	1.073	0.09372	1.847	0.4105	1.899	0.2821	2.081	0.4614	2.053	0.7216	1.786	0.2328	1.9	0.1941	1.765	0.6242	1.915	0.5801
[153Eu]+	0.2559	0.05417	0.2515	0.06498	0.2371	0.05163	0.2609	0.06195	0.1969	0.04719	0.2884	0.07446	0.2225	0.0314	0.9193	0.1909	0.9638	0.1543	1.175	0.272	0.8914	0.1963	0.9979	0.1113	0.918	0.07726	1.794	0.3646	2.122	0.2793	2.007	0.4868	2.048	0.6229	1.931	0.2617	1.892	0.1841	2.108	0.4586	2.022	0.3818
[157Gd]+	0.9187	0.1861	0.9883	0.2688	1.132	0.2513	1.06	0.231	0.8184	0.2235	1.035	0.302	0.934	0.1394	2.583	0.5763	2.448	0.4857	3.399	0.8986	2.344	0.5906	2.998	0.3674	2.654	0.2038	5.412	1.171	5.954	0.8519	5.577	1.54	6.107	2.161	4.586	0.6853	5.807	0.496	5.394	0.7972	5.62	0.728
[159Tb]+	0.2203	0.03924	0.1983	0.04654	0.2769	0.06925	0.2729	0.06167	0.1944	0.04138	0.2544	0.05772	0.212	0.03418	0.3233	0.0629	0.4628	0.1043	0.4636	0.09686	0.3405	0.06772	0.4055	0.05658	0.364	0.03703	0.8353	0.1529	0.8125	0.1001	0.8462	0.1835	0.9192	0.3776	1.153	0.1952	0.8247	0.09783	0.9246	0.2115	0.8342	0.1661
[161Dy]+	1.895	0.2544	1.707	0.4202	1.841	0.3188	2.192	0.3607	1.322	0.2799	1.838	0.4199	1.44	0.1703	2.307	0.4734	2.822	0.4223	2.78	0.5834	1.983	0.396	2.392	0.2421	2.326	0.1794	4.612	0.9257	5.381	0.73	5.057	1.101	5.496	2.073	4.163	0.5092	5.125	0.4467	4.941	0.9382	5.346	0.8844
[163Dy]+	1.797	0.1911	1.875	0.3473	1.97	0.3676	1.783	0.2496	1.338	0.3002	1.898	0.4614	1.574	0.1835	2.32	0.3712	2.623	0.4598	2.866	0.6436	1.943	0.4128	2.432	0.2462	2.474	0.175	4.791	0.7098	5.452	0.5623	5.042	1.179	5.561	1.854	4.133	0.5135	5.034	0.4094	5.094	0.7991	5.279	0.7211
[165Ho]+	0.4506	0.05531	0.4705	0.07888	0.5273	0.1237	0.5295	0.09643	0.3056	0.07101	0.4154	0.1034	0.3592	0.05277	0.3723	0.0569	0.5153	0.08059	0.5793	0.1335	0.3409	0.07487	0.4709	0.06085	0.4596	0.04036	0.9867	0.1482	1.038	0.1268	0.9152	0.221	0.9997	0.314	1.269	0.1983	0.9149	0.09314	0.9328	0.1766	0.9083	0.1489
[166Er]+	1.291	0.1504	1.29	0.284	1.834	0.3741	1.46	0.2434	0.8396	0.2041	1.312	0.3433	1.138	0.1483	1.015	0.1979	1.424	0.277	1.681	0.4069	0.9714	0.2226	1.356	0.1568	1.276	0.1095	2.43	0.443	2.445	0.3054	2.518	0.6352	2.7	1.228	2.487	0.3484	2.288	0.2265	2.429	0.452	2.505	0.408
[167Er]+	1.244	0.1769	1.199	0.2894	1.273	0.2804	1.508	0.2751	0.8978	0.2404	1.262	0.3657	1.091	0.1454	1.209	0.2525	1.432	0.2671	1.752	0.4688	0.9029	0.2289	1.315	0.1545	1.293	0.1243	2.508	0.5015	2.565	0.3421	2.484	0.6886	2.834	1.323	2.481	0.3509	2.336	0.2585	2.432	0.6065	2.966	0.6483
[169Tm]+	0.1648	0.02822	0.1994	0.06098	0.223	0.05071	0.267	0.05158	0.1417	0.03937	0.2029	0.06082	0.1614	0.05373	0.1753	0.04575	0.2454	0.05049	0.2241	0.06295	0.1442	0.03842	0.1943	0.05654	0.1737	0.02842	0.3048	0.07655	0.3612	0.06055	0.2885	0.08392	0.3907	0.2294	0.91	0.3224	0.3091	0.0602	0.3167	0.09824	0.3406	0.09233
[172Yb]+	1.113	0.1557	1.32	0.3536	1.223	0.2993	1.56	0.2691	0.9286	0.226	1.354	0.3599	1.12	0.1493	1.09	0.2542	1.734	0.358	1.481	0.3594	0.9594	0.2197	1.356	0.1609	1.069	0.127	1.943	0.4355	2.05	0.3109	1.916	0.4857	2.196	1.174	2.158	0.3063	1.91	0.264	1.899	0.3885	1.844	0.3363
[173Yb]+	1.257	0.1787	1.363	0.3584	1.537	0.353	1.825	0.3955	0.7779	0.2148	1.406	0.415	1.107	0.168	1.076	0.244	1.628	0.313	1.447	0.4002	1.005	0.2622	1.407	0.1872	1.29	0.1235	1.892	0.4151	2.429	0.348	1.919	0.5504	2.217	1.152	2.341	0.3787	1.951	0.2069	1.856	0.4363	1.998	0.4079
[175Lu]+	0.1677	0.02869	0.1887	0.05806	0.2123	0.06231	0.2032	0.05097	0.09265	0.02703	0.2086	0.06533	0.1457	0.04624	0.162	0.04388	0.2259	0.06276	0.2313	0.0678	0.1081	0.02977	0.1823	0.05178	0.159	0.01898	0.2749	0.07053	0.2563	0.04651	0.2786	0.08516	0.3394	0.2468	0.9255	0.316	0.2541	0.03508	0.2593	0.0811	0.2914	0.07768
[177Hf]+	0.3113	0.07333	0.2735	0.07692	0.4491	0.09697	0.4234	0.0907	0.2212	0.1193	0.4477	0.2586	0.3198	0.04399	2.935	0.6062	3.374	0.5763	4.699	2.489	1.536	0.7727	3.314	0.3255	3.231	0.2437	4.465	0.892	4.793	0.6332	4.974	2.77	4.209	2.164	4.297	0.5201	4.274	0.3831	4.41	0.9775	4.365	0.8372
[178Hf]+	0.3028	0.06049	0.2291	0.05613	0.342	0.07024	0.4834	0.1001	0.1405	0.07745	0.4438	0.2532	0.372	0.04873	3.082	0.5314	3.602	0.4912	4.573	2.415	1.557	0.7742	3.351	0.3421	3.08	0.2625	4.285	0.724	4.635	0.5137	4.74	2.628	4.17	1.17	4.254	0.5408	4.084	0.42	4.238	0.7859	4.582	0.7276
[181Ta]+	0.03573	0.01643	0.01822	0.007239	0.02991	0.01115	0.04342	0.01564	0.01381	0.01083	0.0349	0.03276	0.02451	0.02082	0.3551	0.06104	0.5568	0.1143	0.6307	0.5119	0.2409	0.1852	0.4605	0.3326	0.3231	0.1989	1.104	0.1785	1.174	0.1286	1.386	1.189	1.116	0.5576	1.364	1.241	0.8689	0.6585	0.7312	0.738	0.7472	0.6461
[182W]+	16.75	1.479	13.82	3.775	19.48	3.017	18.8	1.824	4.8	3.241	12.7	9.47	14.05	5.094	0.3095	0.08437	0.381	0.1655	0.3681	0.2483	0.1312	0.08607	0.5132	0.2027	0.3887	0.2426	0.2645	0.07506	0.4593	0.2298	0.2088	0.1481	0.2229	0.2384	10.1	4.082	0.2278	0.1747	0.2597	0.1117	0.1773	0.07376
[183W]+	15.75	1.666	13.39	4.286	21.25	4.484	20.16	2.673	4.344	2.934	12.36	9.22	13.91	5.096	0.4093	0.135	0.6387	0.3121	0.3274	0.2231	0.1312	0.08601	0.4092	0.1704	0.4106	0.2592	0.2441	0.08676	0.4844	0.173	0.1998	0.1413	0.1599	0.0686	10.95	4.479	0.2818	0.2154	0.329	0.1543	0.2081	0.09023
[188Os]+	1.455	1.886	0.0649	0.1923	0.6293	11.52	29.49	346.5	0.4663	0.3944	1.108	0.2807	0.6443	0.3573	0.729	2.719	4.786	3.465	1.622	0.8929	0.5752	0.3751	1.291	0.5938	1.12	0.7195	0.4486	1.396	0.9727	2.553	0.8042	0.3651	0	nan	0.7769	0.3614	-0.2344	0.5017	-0.1867	2.02	0.1268	3.589
[189Os]+	0.3034	0.6512	0.2169	1.838	10.01	36.06	20.49	29.27	0.7611	0.4467	2.2	0.6986	1.755	0.7735	0.6219	3.821	0.3331	0.2751	0.5042	0.2065	1.626	0.8107	0.6393	0.4542	0.3886	0.5944	1.693	10.06	2.393	8.035	0.5094	0.2408	0	nan	1.695	0.4869	0.03609	0.5213	1.619	1.55	1.003	3.984
[191Ir]+	0.198	0.06328	0.1295	0.08439	0.3424	0.4249	0.2272	0.1728	0.006967	0.005517	0.5776	0.05453	1.078	0.1484	0.04509	0.02811	0.1151	0.04818	0.1932	0.03519	0.006015	0.002865	0.639	0.1049	0.2611	0.05554	0.0168	0.01098	0.02731	0.02645	0.03897	0.0139	23.99	13.7	0.4197	0.1481	0.04245	0.0518	0.2374	0.1266	0.07322	0.111
[193Ir]+	0.07861	0.03836	0.1066	0.05621	0.2135	0.2019	0.2542	0.1763	0.01229	0.004971	0.5506	0.04159	1.249	0.1344	0.03532	0.01904	0.1051	0.03542	0.2015	0.02723	0.002507	0.00103	0.6462	0.09109	0.2433	0.04214	0.03169	0.0191	0.007786	0.004974	0.01472	0.004608	1.07	0.7732	0.363	0.09028	0.1911	0.0629	0.002235	0.007942	0.02443	0.01644
[194Pt]+	14.62	2.318	13.06	6.647	19.73	5.462	18.89	2.987	0.003638	0.00338	17.93	14.93	20.99	46.62	2.624	1.147	3.341	0.2655	3.17	2.442	0.00399	0.003635	4.338	8.489	3.449	7.65	0.09219	0.04913	0.1786	0.06684	0.3045	0.2451	0.9652	2.195	0.3968	0.9649	0.1914	0.5263	0.1813	0.3859	0.0762	0.1418
[195Pt]+	14.11	1.968	12.47	5.502	17.51	5.164	18.5	3.023	0.004842	0.004522	18.27	15.87	21.51	47.78	2.491	0.9579	3.61	0.265	3.331	2.677	0.01001	0.009345	4.576	9.004	3.031	8.077	0.1212	0.05524	0.07863	0.03455	0.2848	0.2381	15.8	27.56	0.3754	0.9228	0.1598	0.5176	0.162	0.3708	0.1097	0.2345
[197Au]+	0.1111	0.07168	0.1066	0.1915	0.04852	0.04231	0.03326	0.01866	0.001276	0.001845	0.163	0.2407	0.03831	0.1446	0.08772	0.1308	0.03455	0.05052	0.07509	0.09921	0.0004075	0.000539	0.06741	0.2311	0.02817	0.04982	0.7892	1.151	0.8144	0.7852	0.6235	0.8327	1.615	0.9004	1.833	7.735	0.3609	0.7619	0.4582	0.7464	0.2863	0.3816
[199Hg]+	0.6359	0.2414	0.6716	0.8615	0.2506	0.09492	0.1227	0.04974	0.0004352	0.0002166	0.3265	0.01071	0.5816	0.01519	0.6737	0.7409	0.2882	0.0173	0.3756	0.01297	0.0009704	0.0005375	0.6488	0.01459	0.3327	0.02391	0.6576	0.7101	0.5944	0.392	0.3692	0.01155	0	nan	0.4894	0.01135	0.2751	0.01952	0.1528	0.009931	0.1452	0.0102
[200Hg]+	0.6836	0.2564	0.6885	0.877	0.2695	0.0997	0.107	0.04338	0.000873	0.0005502	0.3125	0.008493	0.5737	0.01261	0.6772	0.7404	0.2853	0.01475	0.3839	0.01055	0.0004731	0.0002415	0.6564	0.01255	0.2821	0.01811	0.6365	0.6843	0.5971	0.4021	0.3547	0.009103	0	nan	0.4759	0.009595	0.2613	0.01608	0.2809	0.01087	0.2602	0.01176
[202Hg]+	0.6578	0.2426	0.6658	0.8148	0.2341	0.09412	0.09943	0.04062	0.003225	0.0008598	0.3253	0.007578	0.5702	0.01078	0.646	0.6786	0.2918	0.01298	0.3757	0.009543	0.002568	0.0006197	0.6583	0.01117	0.3196	0.01725	0.6487	0.6699	0.5635	0.3567	0.331	0.007741	0	nan	0.4655	0.008006	0.3019	0.01519	0.2489	0.009312	0.2827	0.0108
[203Tl]+	0.03149	0.01558	0.006485	0.005823	0.004276	0.005087	0.002704	0.003106	0.0008292	0.0005035	0.3872	0.3856	0.0337	0.009191	0.1376	0.08992	0.09912	0.0842	0.1298	0.03029	0.002353	0.001214	0.1603	0.03422	0.1152	0.02543	0.03093	0.02168	0.02172	0.01208	0.02298	0.006289	0.3726	0.3364	1.009	0.254	0.05043	0.01403	0.0223	0.013	0.04015	0.01907
[205Tl]+	0.008519	0.006056	0.001847	0.001537	0.000862	0.0005686	0.00816	0.008091	0.002626	0.001221	0.2761	0.2625	0.04109	0.01072	0.1108	0.04813	0.1064	0.07446	0.1175	0.02487	0.01237	0.002931	0.1501	0.03423	0.1065	0.02159	0.01247	0.006238	0.04023	0.01593	0.0229	0.0054	0.0646	0.03265	1.07	0.2957	0.04957	0.01209	0.03366	0.01306	0.03698	0.01258
[206Pb]+	0.5885	0.09572	0.4567	0.1552	0.896	0.3162	0.9595	0.2199	0.1455	0.03211	2.197	0.9479	0.8496	0.1572	7.484	2.066	7.467	3.082	6.922	1.477	1.277	0.2573	8.544	1.378	8.737	1.201	1.534	0.422	1.768	0.3133	1.761	0.3933	1.515	0.3519	9.544	1.917	2.155	0.3624	2.148	0.5668	2.17	0.4935
[207Pb]+	0.728	0.1254	0.4141	0.1388	0.891	0.328	1.086	0.2631	0.2332	0.05089	2.434	1.099	0.889	0.2282	7.79	2.091	7.598	3.23	7.337	1.56	1.843	0.3721	8.832	1.999	8.789	1.24	1.676	0.4515	1.768	0.308	1.907	0.4249	1.394	0.3186	10.43	2.946	2.222	0.3857	2.35	0.7072	2.251	0.5824
[208Pb]+	0.8383	0.1171	0.6573	0.1388	1.365	0.4839	1.487	0.3749	0.4084	0.2611	3.531	3.036	0.855	0.2178	9.011	1.612	7.943	2.667	12.71	8.212	3.686	2.253	8.711	1.963	8.743	1.173	2.417	0.4544	2.384	0.3598	3.255	2.201	1.256	0.272	10.03	2.817	2.229	0.3651	2.289	0.6332	2.144	0.5103
[209Bi]+	0.00874	0.004944	0.009185	0.01543	0.3793	0.279	0.08282	0.02261	0.002523	0.007856	0.05725	0.2623	0.06468	0.06963	0.02038	0.0285	0.09516	0.07026	0.1843	0.5637	0.09684	0.291	0.1548	0.1508	0.2559	0.1579	0.01592	0.02167	0.02962	0.02835	0.01622	0.0518	0.0009046	0.004851	4.839	5.834	0.3194	0.2676	0.1135	0.1018	0.09032	0.072
[232Th]+	0.005462	0.002822	0.01219	0.005066	0.006858	0.004071	0.02023	0.01615	0.09691	0.01836	0.1875	0.03742	0.1928	0.09319	1.934	0.4118	2.013	0.2752	2.684	0.4895	1.94	0.3349	3.239	1.391	2.218	0.2893	1.046	0.2209	1.188	0.1631	0.9409	0.1807	1.176	0.4164	6.589	3.475	1.127	0.1812	0.9551	0.5571	0.9765	0.4883
[235U]+	0.2346	0.2266	0.2847	0.4801	0.3011	0.2853	0.005042	0.006251	0.09838	0.0776	0.09623	0.06849	0.1419	0.1497	0.6122	0.7933	1.31	1.203	1.142	0.683	0.7921	0.4624	1.907	1.421	1.358	0.7846	0.8331	1.046	0.716	0.6572	0.594	0.3744	0.3812	1.09	2.905	2.645	1.219	0.7907	-0.552	0.5055	0.731	0.8119
[238U]+	0.03061	0.009742	0.01873	0.006027	0.03154	0.01104	0.02382	0.008815	0.01846	0.004725	0.2161	0.1737	0.03536	0.02838	0.9051	0.1523	0.8622	0.1605	1.126	0.2587	0.8321	0.1816	1.099	0.7748	0.968	0.1013	0.3593	0.06099	0.4852	0.05603	0.4524	0.1094	0.3912	0.1314	3.385	2.964	0.4194	0.0542	0.4167	0.0946	0.4509	0.08861
